# Supplementary material
Source: PubMed Central journal article supplement (PMC6340021)
Supplement: bea7d9bec49b2d506e0bf706149c4ae5_JVI.01821-18-s0001.pdf [file bea7d9bec49b2d506e0bf706149c4ae5_JVI.01821-18-s0001.pdf]

**Table S1: Tetherin sequences used for phylogenetic analysis.**

| <b>Species</b>                                                | <b>Order</b>           | <b>Reference / GenBank entry</b> | <b>Information</b> |
|---------------------------------------------------------------|------------------------|----------------------------------|--------------------|
| Human<br>( <i>Homo sapiens</i> )                              | <i>Primates</i>        | NP_004326.1                      | ---                |
| Bonobo<br>( <i>Pan paniscus</i> )                             | <i>Primates</i>        | NP_001266147.1                   | ---                |
| Chimpanzee<br>( <i>Pan troglodytes</i> )                      | <i>Primates</i>        | NP_001177409.1                   | ---                |
| Gorilla<br>( <i>Gorilla gorilla</i> )                         | <i>Primates</i>        | ACX46128.1                       | ---                |
| Orangutan<br>( <i>Pongo abelii</i> )                          | <i>Primates</i>        | NP_001166058.1                   | ---                |
| Gibbon<br>( <i>Nomascus leucogenys</i> )                      | <i>Primates</i>        | NP_001295602.1                   | ---                |
| Crab-eating macaque<br>( <i>Macaca fascicularis</i> )         | <i>Primates</i>        | XP_005588438.1                   | Predicted          |
| Rhesus macaque<br>( <i>Macaca mulatta</i> )                   | <i>Primates</i>        | AEF16014.1                       | ---                |
| Pig-tailed macaque<br>( <i>Macaca nemestrina</i> )            | <i>Primates</i>        | XP_011753866.1                   | Predicted          |
| Baboon<br>( <i>Papio anubis</i> )                             | <i>Primates</i>        | XP_003915187.1                   | ---                |
| Green monkey<br>( <i>Chlorocebus sabaues</i> )                | <i>Primates</i>        | XP_007993912.1                   | Predicted          |
| African green monkey<br>( <i>Chlorocebus aethiops</i> )       | <i>Primates</i>        | ACP50609.1                       | ---                |
| Douc<br>( <i>Pygathrix nemaeus</i> )                          | <i>Primates</i>        | ADI58604.1                       | ---                |
| Marmoset<br>( <i>Callithrix jacchus</i> )                     | <i>Primates</i>        | XP_002761930.2                   | Predicted          |
| Squirrel monkey<br>( <i>Saimiri boliviensis boliviensis</i> ) | <i>Primates</i>        | XP_003942316.1                   | Predicted          |
| Tamarin<br>( <i>Saguinus labiatus</i> )                       | <i>Primates</i>        | ADI58606.1                       | ---                |
| Night monkey<br>( <i>Aotus nancymae</i> )                     | <i>Primates</i>        | ACN12811.1                       | ---                |
| Flying lemur<br>( <i>Galeopterus variegatus</i> )             | <i>Dermoptera</i>      | XP_008578784.1                   | Predicted          |
| Horse<br>( <i>Equus caballus</i> )                            | <i>Perissodactyla</i>  | AHJ78592.1                       | ---                |
| Rhinoceros<br>( <i>Ceratotherium simum simum</i> )            | <i>Perissodactyla</i>  | XP_014637034.1                   | Predicted          |
| Pig<br>( <i>Sus scrofa</i> )                                  | <i>Cetartiodactyla</i> | NP_001155227.1                   | ---                |
| Walrus<br>( <i>Odobenus rosmarus divergens</i> )              | <i>Carnivora</i>       | XP_004404771.2                   | Predicted          |
| Polar bear<br>( <i>Ursus maritimus</i> )                      | <i>Carnivora</i>       | XP_008702180.1                   | Predicted          |
| Dog<br>( <i>Canis lupus familiaris</i> )                      | <i>Carnivora</i>       | XP_865603.1                      | ---                |
| Cat<br>( <i>Felis catus</i> )                                 | <i>Carnivora</i>       | NP_001230014.1                   | ---                |
| Egyptian fruit bat                                            | <i>Chiroptera</i>      | XP_016013286.1                   | Predicted          |

|                                                                     |                   |                                                   |                                        |
|---------------------------------------------------------------------|-------------------|---------------------------------------------------|----------------------------------------|
| <i>(Rousettus aegyptiacus)</i>                                      |                   |                                                   |                                        |
| Black flying fox<br><i>(Pteropus alecto)</i>                        | <i>Chiroptera</i> | XP_006904341.1<br>(X1),<br>XM_015587122.1<br>(X2) | Predicted, 2<br>transcript<br>variants |
| Malayan flying fox<br><i>(Pteropus vampyrus)</i>                    | Chiroptera        | XP_011365136.1<br>(X1),<br>XP_011365137.1 (X2)    | Predicted, 2<br>transcript<br>variants |
| Great roundleaf bat<br><i>(Hipposideros armiger)</i>                | Chiroptera        | XP_019497311.1                                    | Predicted                              |
| Chinese rufous horseshoe bat<br><i>(Rhinolophus sinicus)</i>        | Chiroptera        | XP_019592303.1                                    | Predicted                              |
| Little brown bat<br><i>(Myotis lucifugus)</i>                       | Chiroptera        | XP_014303978.1                                    | Predicted                              |
| Brandt's bat<br><i>(Myotis brandtii)</i>                            | Chiroptera        | XP_005873983.1                                    | Predicted                              |
| David's myotis<br><i>(Myotis davidii)</i>                           | Chiroptera        | XM_006768454.2                                    | Predicted                              |
| Hammer-headed fruit bat<br><i>(Hypsignathus monstrosus)</i>         | Chiroptera        | Present study                                     | HypNi/1.1<br>cells                     |
| Buettikofer's epauletted fruit bat<br><i>(Epomops buettikoferi)</i> | Chiroptera        | Present study                                     | EpoNi/22.1<br>cells                    |
| Common Rat<br><i>(Rattus norvegicus)</i>                            | <i>Rodentia</i>   | NP_937767.1                                       | ---                                    |
| House mouse<br><i>(Mus musculus)</i>                                | <i>Rodentia</i>   | NP_932763.1                                       | CZECHII<br>strain                      |
| Chinese hamster<br><i>(Cricetulus griseus)</i>                      | <i>Rodentia</i>   | EGV97482.1                                        | CHO-K1 cells                           |
